# Supplementary material for: Microglial PD‐1 stimulation by astrocytic PD‐L1 suppresses neuroinflammation and Alzheimer’s disease pathology
Source: PubMed Central journal article supplement — EMBO J. 2021 Nov 26;40(24):e108662. doi: 10.15252/embj.2021108662 (PMC8672180; doi:10.15252/embj.2021108662), 2021-11-26
Supplement: EMBJ-40-e108662-s003.pdf [file EMBJ-40-e108662-s003.pdf]

## Expanded View Figures

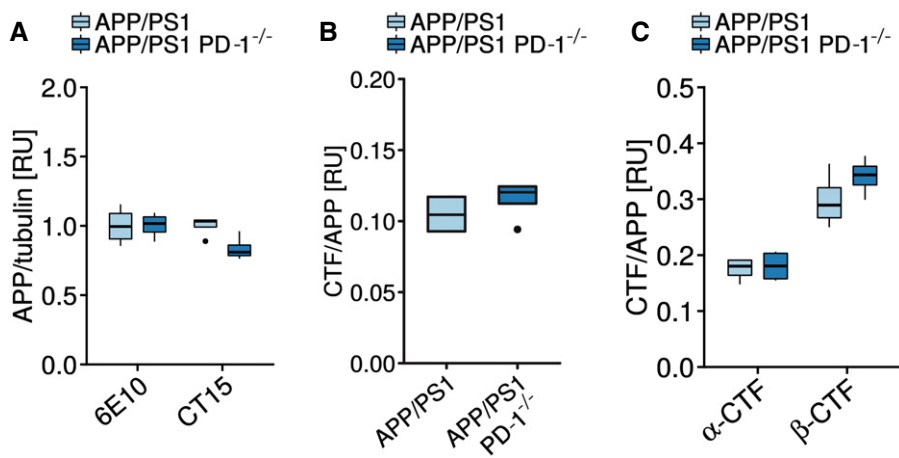

**Figure EV1. APP expression is unaltered in APP/PS1 PD-1<sup>-/-</sup> mice.**

- A** Quantification of the APP expression normalized to tubulin shown in Fig 4F (biological replicates with  $n = 4$  mice per group, one-way ANOVA ( $df = 1$ ,  $F = 2.776$ ,  $P = 0.122$ ), Tukey's *post hoc* test).
- B** Quantification of the 6E10 Western blot and the calculation of the APP C-terminal fragment (CTF)-to-APP ratio shown in Fig 4F (biological replicates with  $n = 4$  mice per group, Student's *t*-test ( $t = 0.9435$ ,  $df = 6$ ),  $P = 0.3818$ ).
- C** Quantification of the CT15 Western blot and the calculation of the APP  $\alpha$ -C-terminal fragment ( $\alpha$ -CTF)-to-APP and the APP  $\beta$ -C-terminal fragment ( $\beta$ -CTF)-to-APP ratio shown in Fig 4F (biological replicates with  $n = 4$  mice per group, ANOVA ( $df = 1$ ,  $F = 1.184$ ,  $P = 0.298$ ), Tukey HSD).

Data information: (A–C) Central bands represent median, boxes show interquartile range (IQR), and whiskers define the  $\pm 1.5 \times \text{IQR}$ .

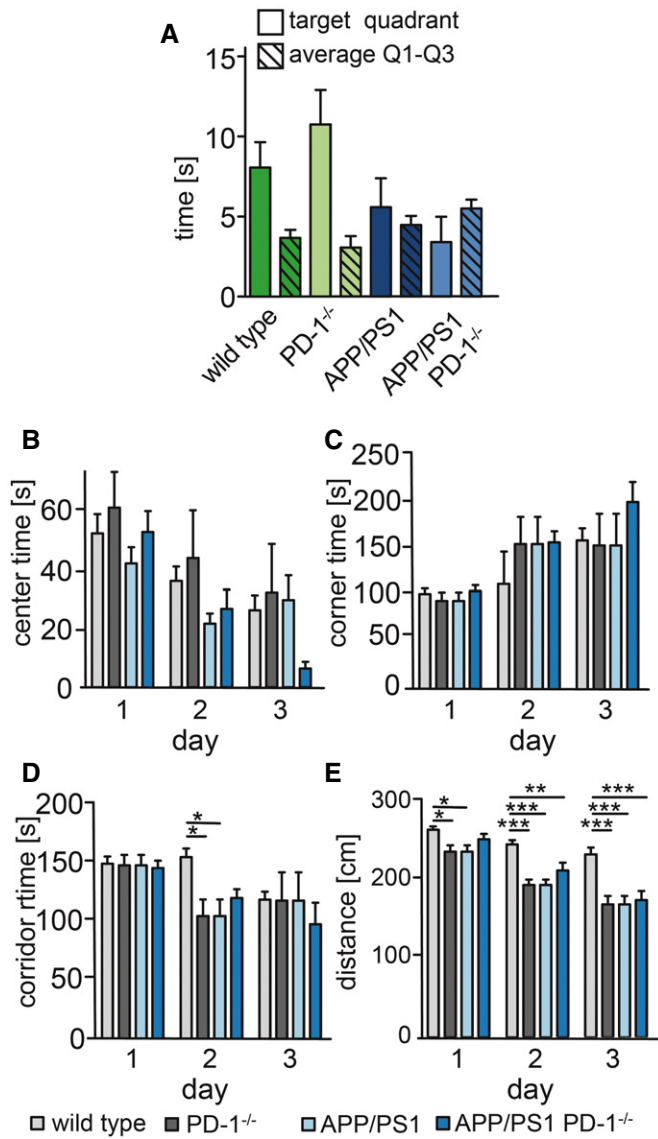

**Figure EV2. Behavioral analysis of wild-type, PD-1<sup>-/-</sup>, APP/PS1, and APP/PS1 PD-1<sup>-/-</sup> mice.**

**A** Mice were tested one day after the last trial day for 30 s in the absence of the platform in quadrant 4. The time in the quadrants was measured and averaged for quadrants 1–3.

**B–E** Evaluation of the open field testing for (B) time spend in the center (center time) (ANOVA ( $F = 0.83$ ,  $df = 6$ ,  $P = 0.54$ ), Bonferroni test), (C) corner time (ANOVA ( $F = 0.47$ ,  $df = 6$ ,  $P = 0.93$ ), Bonferroni test), (D) corridor time (ANOVA ( $F = 1.487$ ,  $df = 6$ ,  $P = 0.193$ ), Bonferroni test,  $*P < 0.05$ ), and (E) distance (ANOVA ( $F = 0.83$ ,  $df = 6$ ,  $P = 0.54$ ), Bonferroni test,  $*P < 0.05$ ,  $**P < 0.01$ , and  $***P < 0.001$ ).

Data information: For all panels: mean + SEM of biological replicates with  $n = 12$  for wt,  $n = 5$  for PD-1<sup>-/-</sup>,  $n = 7$  for APP/PS1, and  $n = 5$  for APP/PS1 PD-1<sup>-/-</sup>.

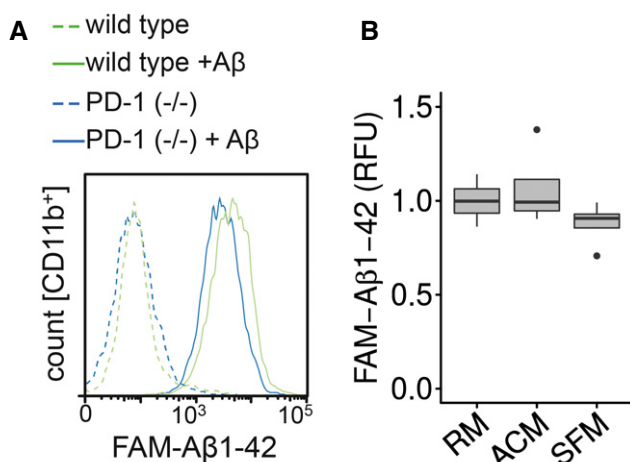

**Figure EV3. Aβ phagocytosis in PD-1<sup>-/-</sup> microglial cells by flow cytometry.**

**A** Microglia from wild-type or PD-1<sup>-/-</sup> mice were incubated with FAM-Aβ1-42, and the increase in fluorescence was measured in the CD11b<sup>+</sup> cells.

**B** Microglia were preincubated for 1 h with regular medium (RM), astrocyte-conditioned medium (ACM), or serum-free medium (SFM) followed by the addition of 0.5 μM FAM-Aβ1-42 for 4 h (median (central band) with interquartile range (IQR; boxes) and ± 1.5xIQR (whiskers) of one experiment in technical quadruplicates, one-way ANOVA ( $df = 2$ ,  $F = 1.493$ ,  $P = 0.275$ ), Tukey's HSD).

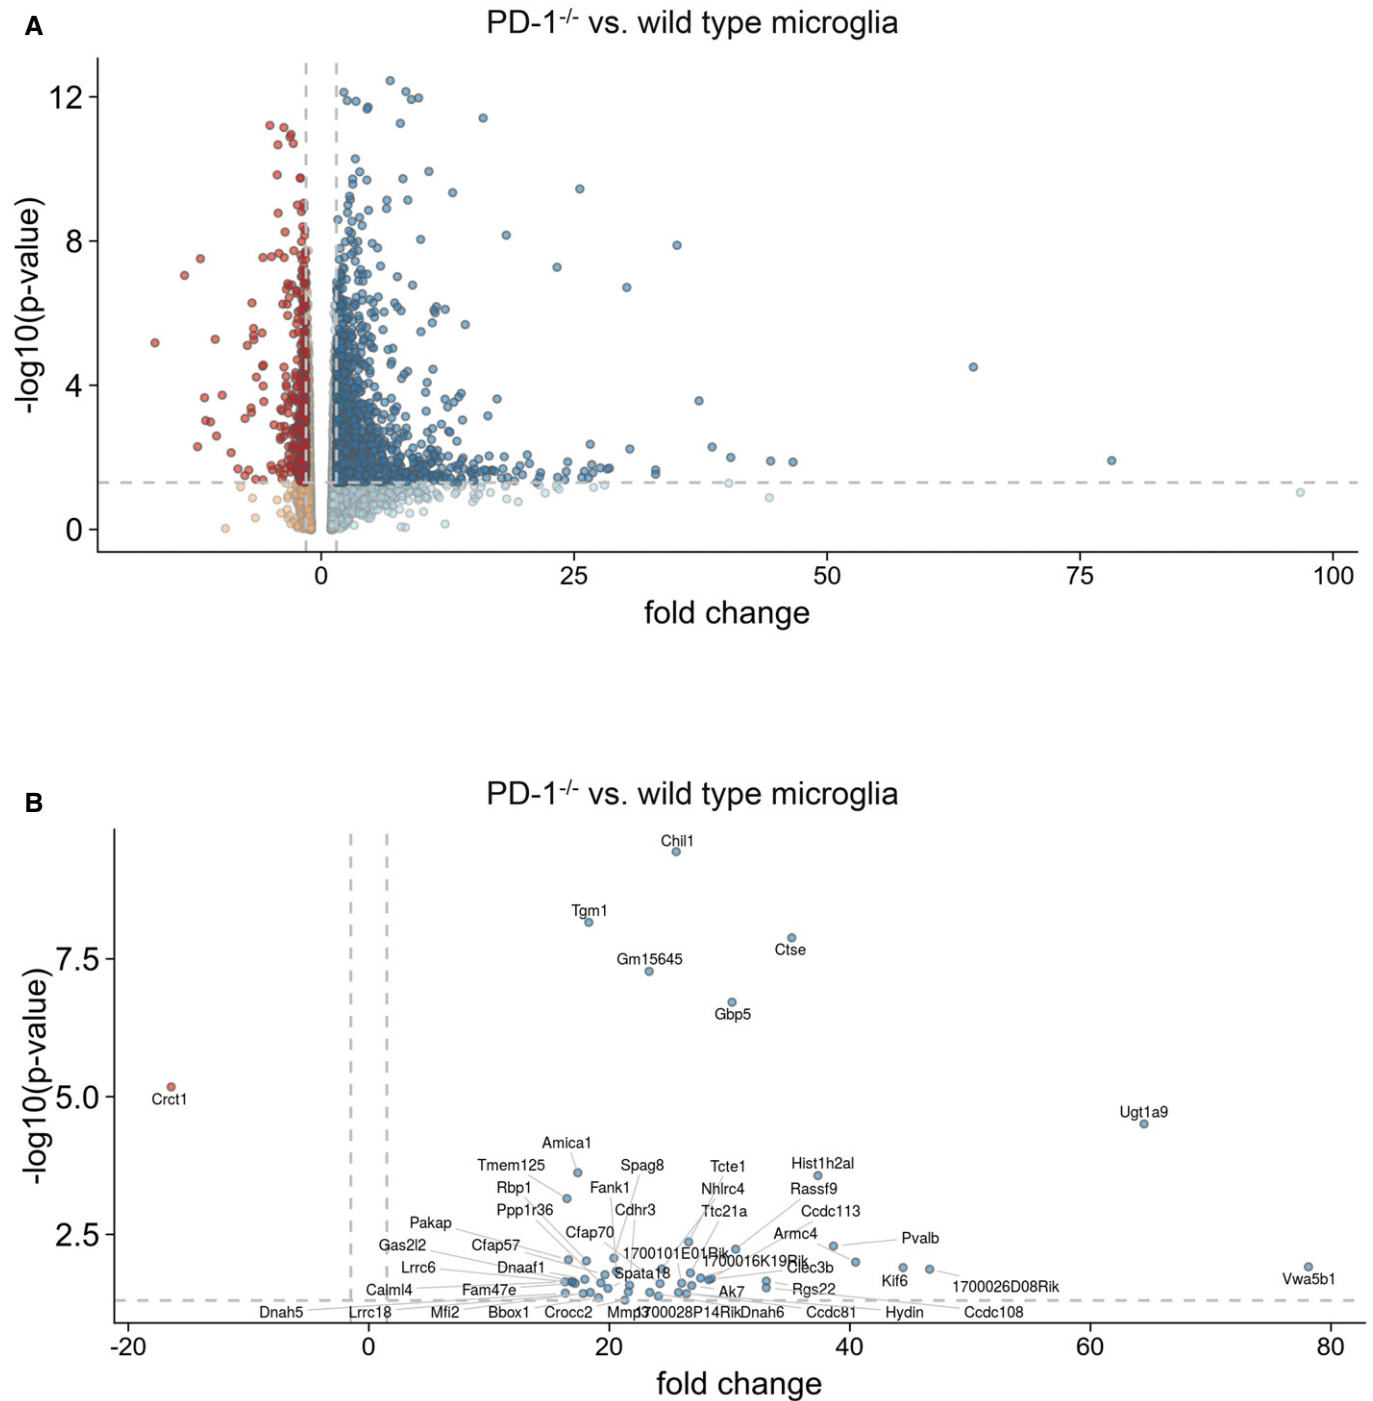

**Figure EV4. Gene expression analysis of wild type and PD-1<sup>-/-</sup> microglia.**

A Gene expression in microglia from wild-type or PD-1<sup>-/-</sup> mice presented as a Volcano plot. Dark data points represent more than 1.5 times up- or downregulated genes that have a *P*-value of 0.05 or less (one-way ANOVA, dashed lines represent fold change  $\pm$  1.5 and *P* = 0.05).

B Same as A but only the top 50 regulated genes are depicted (one-way ANOVA, dashed lines represent fold change  $\pm$  1.5 and *P* = 0.05).

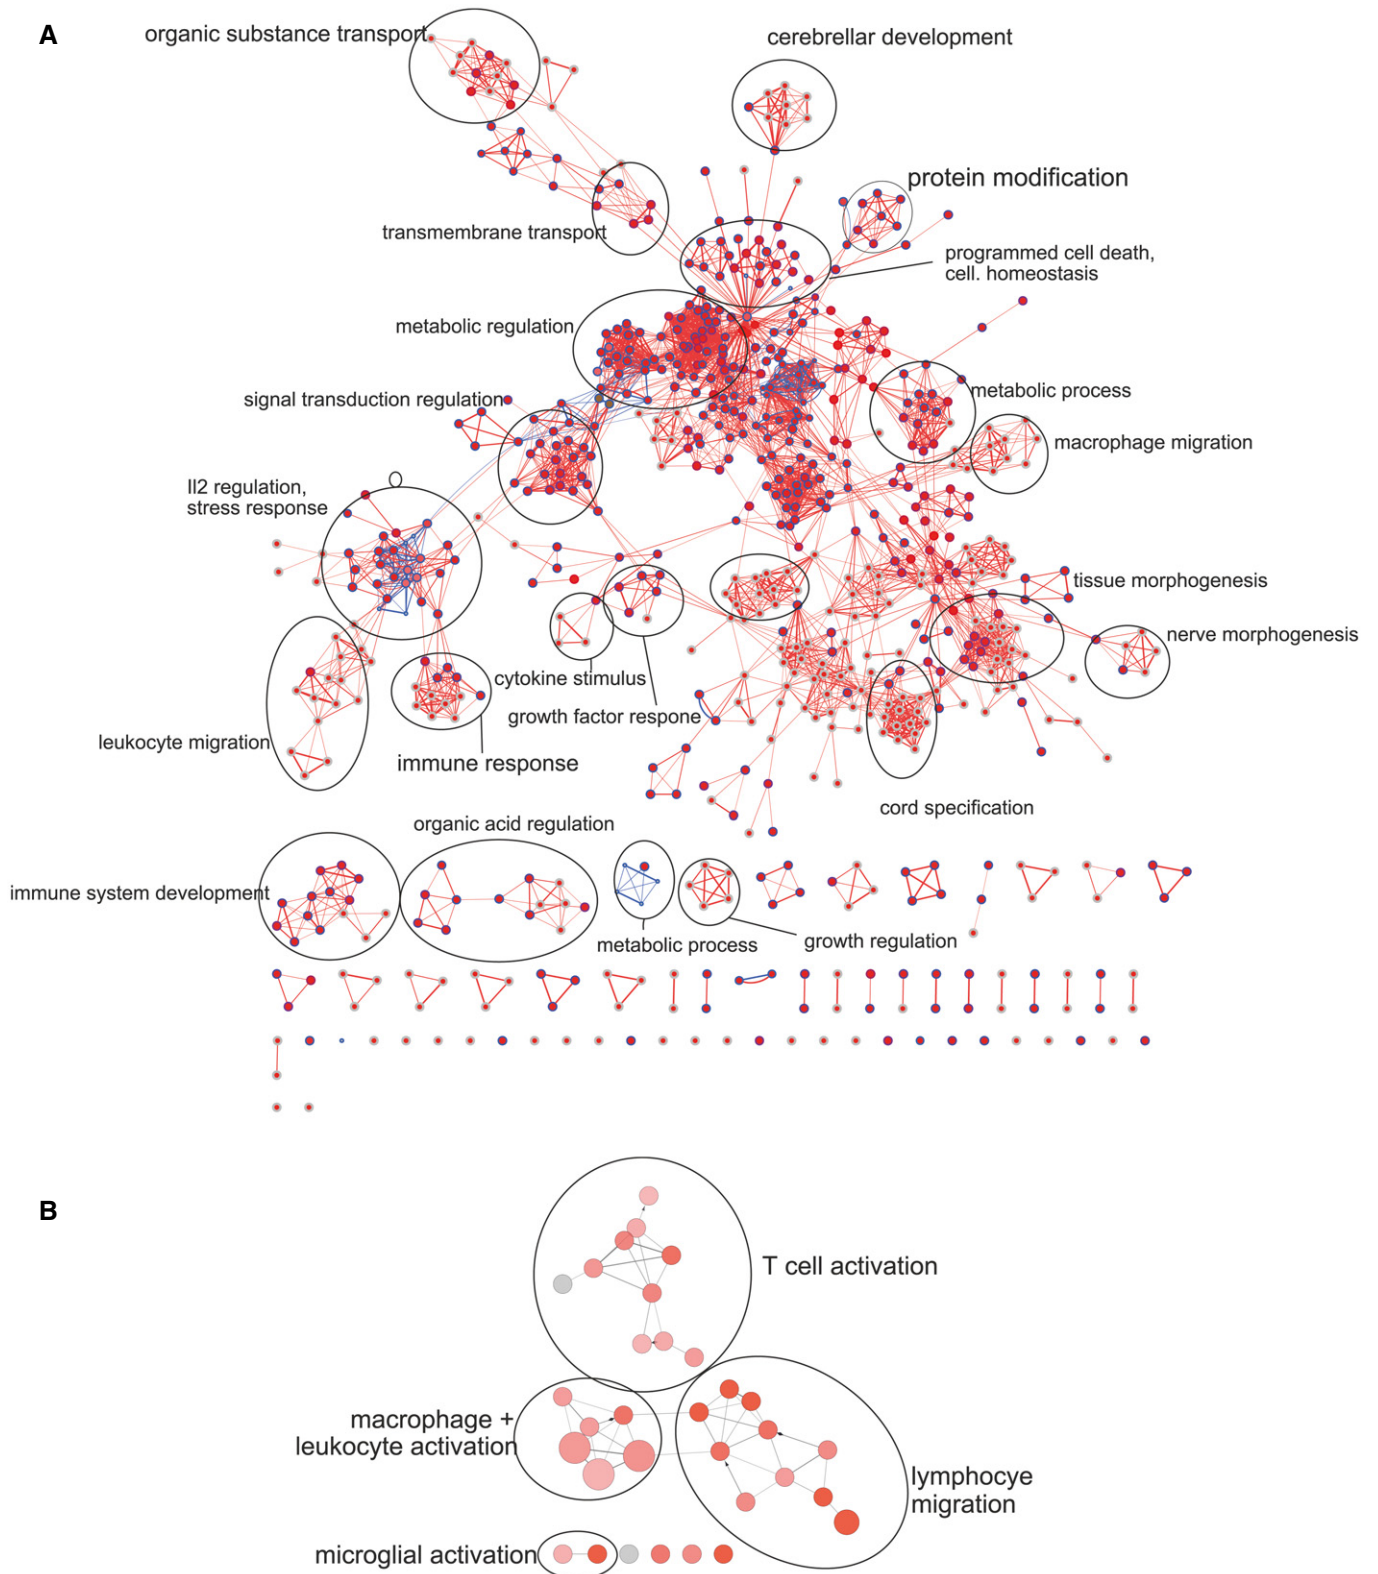

**Figure EV5. Gene ontology (GO) enrichment analysis.**

A Visualization of gene ontology enrichment analysis (GOEA) of DE genes (PD-1<sup>-/-</sup> vs. wild-type microglia: blue = downregulated genes, red = upregulated genes) using BiNGO and the EnrichmentMap plugin.

B ClueGO network analysis of "Immune System Process" GO terms of DE genes (PD-1<sup>-/-</sup> vs. wild-type microglia: red = upregulated genes).
